# Supplementary material
Source: publisher site journal article supplement (https://www.spandidos-publications.com/1732/downloadSupplementary)

Figure S1. Reverse transcription-quantitative PCR verified that the expression of ITGA3 was significantly increased in the pcDNA-ITGA3 group at the mRNA level. \*\*P<0.01. ITGA3, integrin  $\alpha 3\beta 1$ ; NC, negative control.

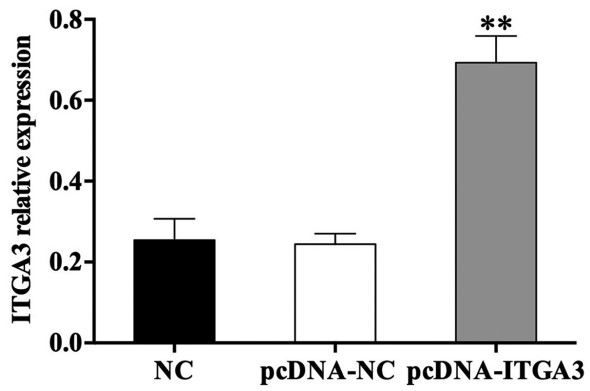

Figure S2. Western blotting verified that the expression of ITGA3 was significantly increased in the pcDNA-ITGA3 group at the protein level. ITGA3, integrin  $\alpha3\beta1$ ; NC, negative control.

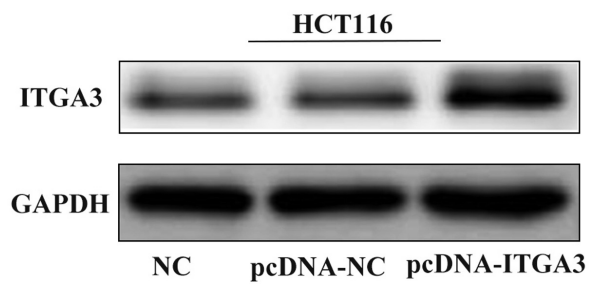

Supplement: Supplementary file 1 [file downloadSupplementary]
